# Supplementary material for: Chromosome-level genome assemblies and genetic maps reveal heterochiasmy and macrosynteny in endangered Atlantic Acropora
Source: PubMed Central journal article supplement (PMC11577847; doi:10.1186/s12864-024-11025-3), 2024-11-20

# Atlantic Acropora

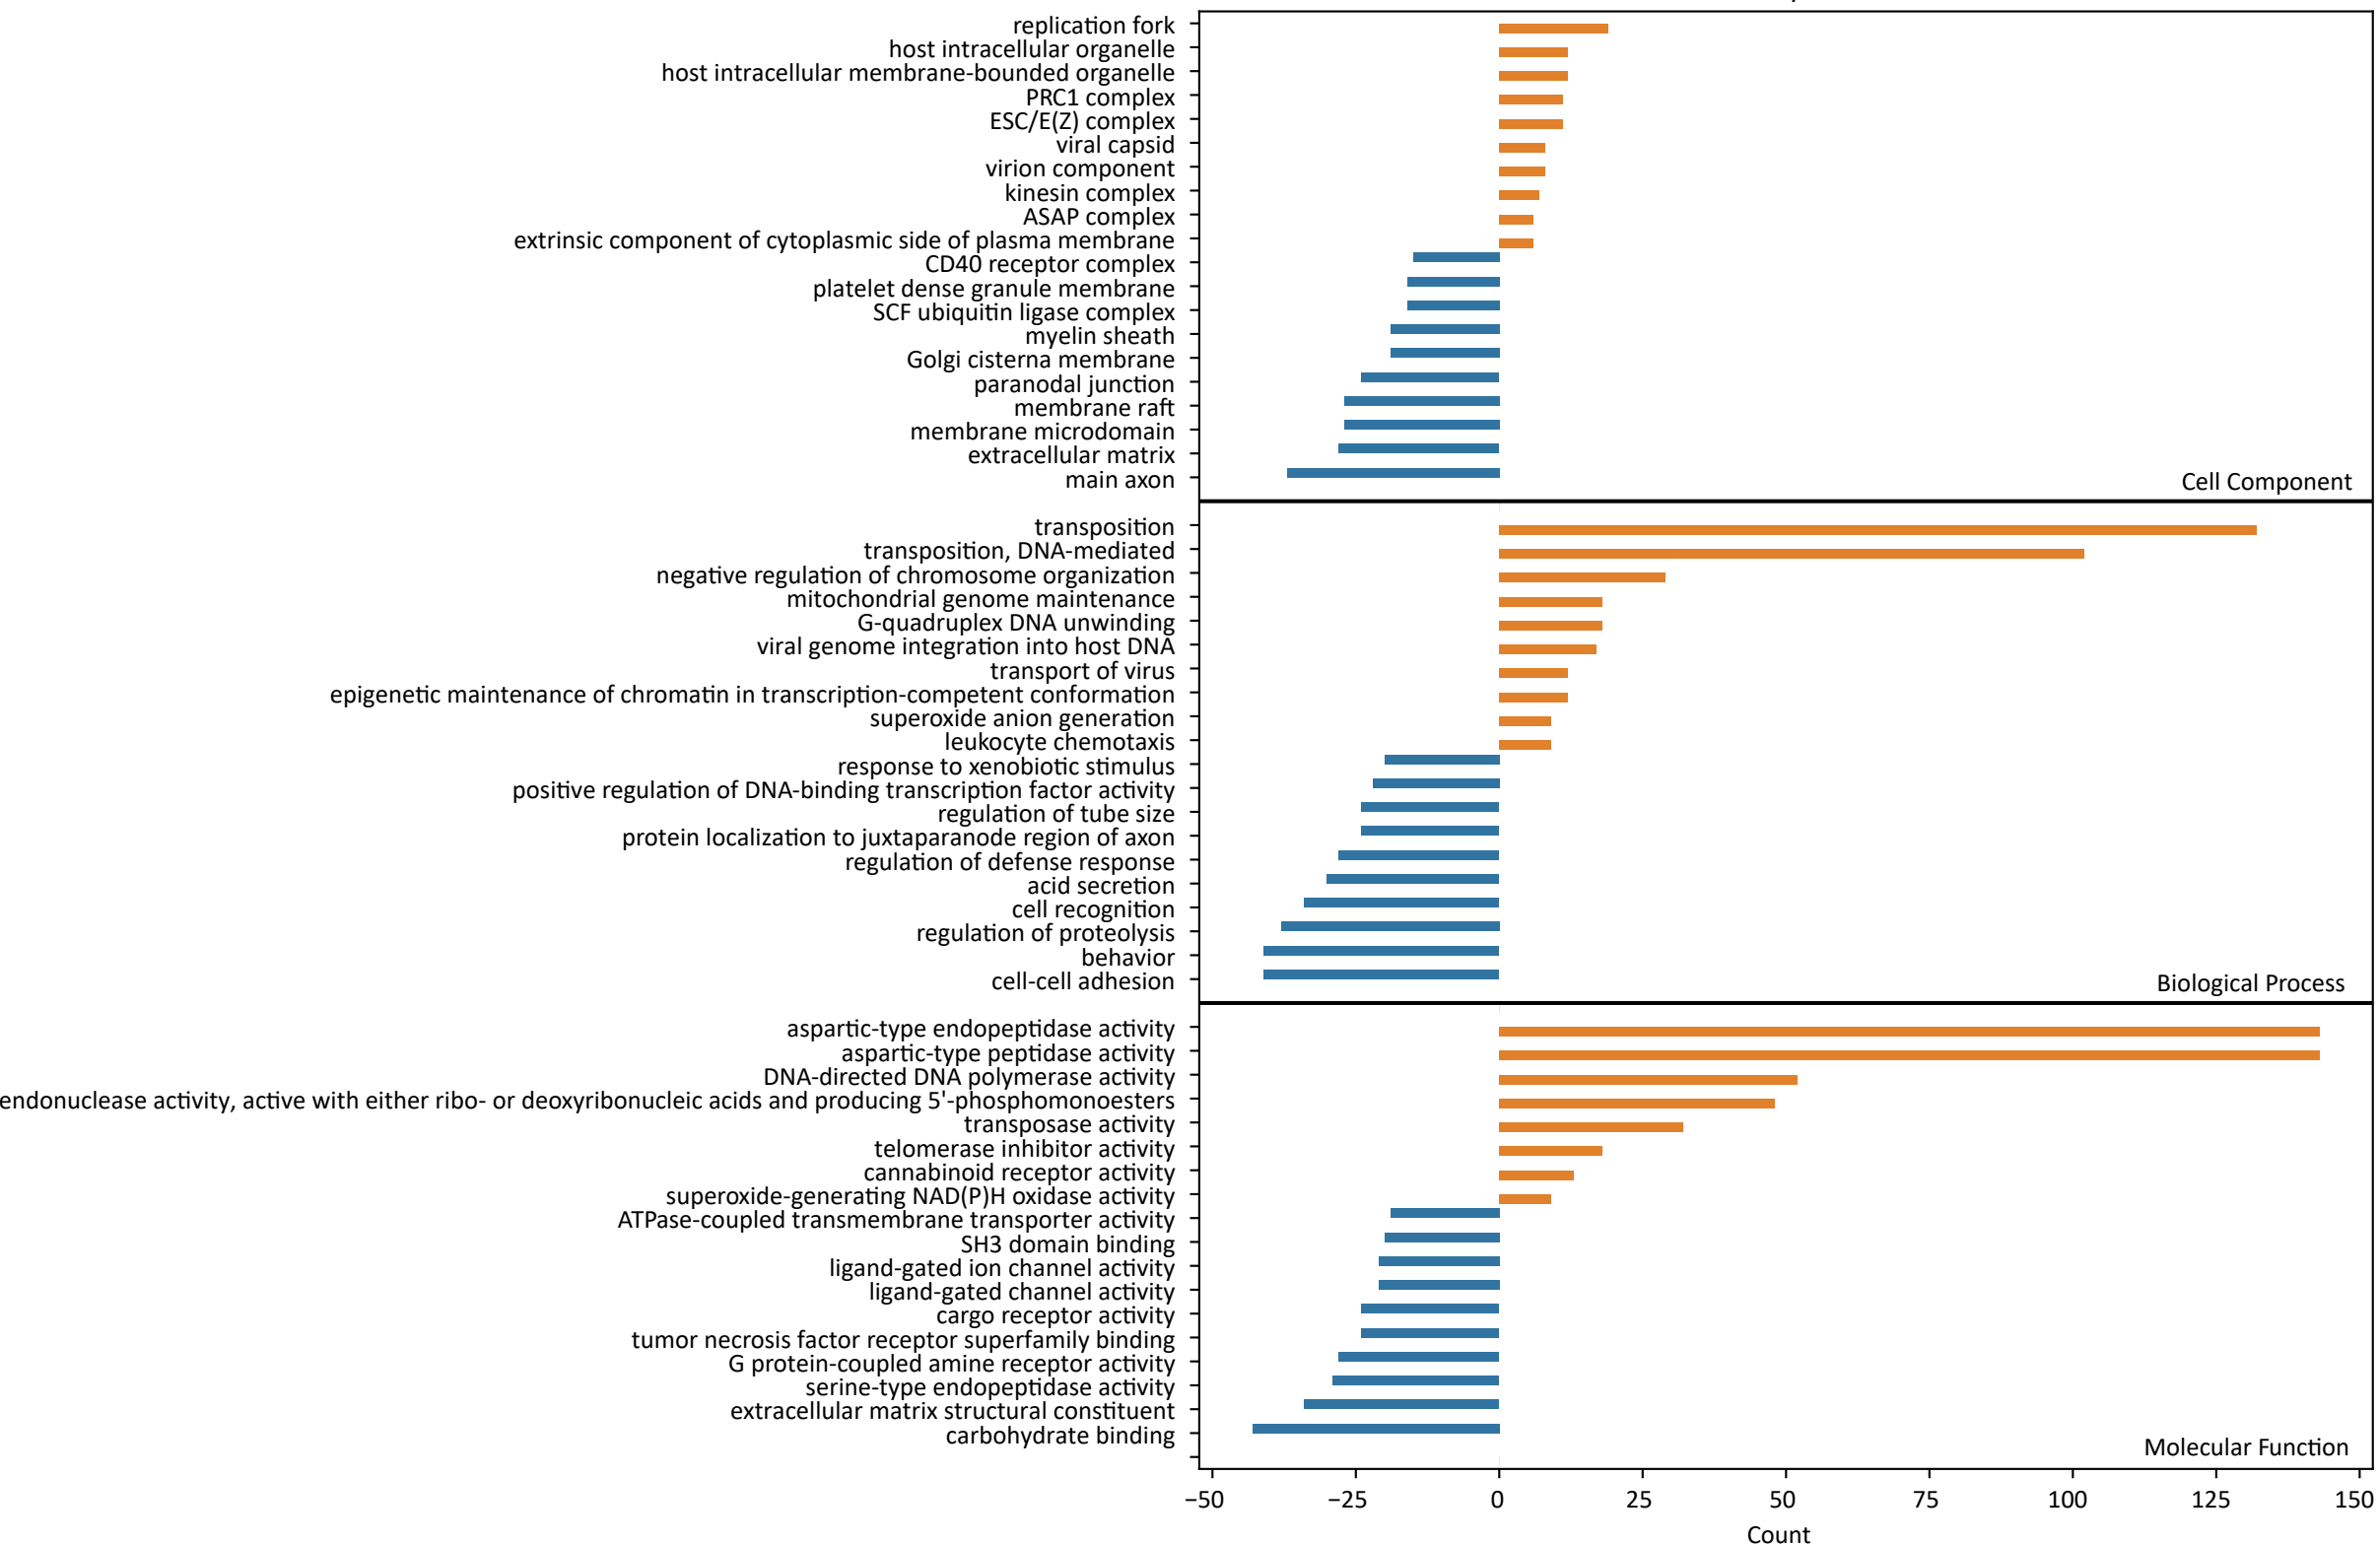

Supplement: 12864_2024_11025_MOESM16_ESM.pdf [file 12864_2024_11025_MOESM16_ESM.pdf]
